# Supplementary material for: Targeted Disruption of LDLR Causes Hypercholesterolemia and Atherosclerosis in Yucatan Miniature Pigs
Source: PLOS journal article supplement (doi:10.1371/journal.pone.0093457), 2014-04-01
Supplement: S1 (10.1371/journal.pone.0093457.s001) [file journal.pone.0093457.s001]

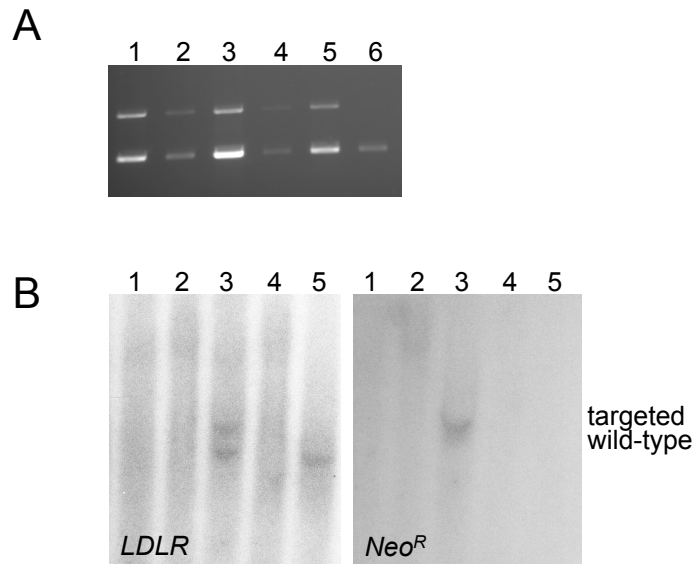

**Figure S1. Genotyping results from *LDLR*-targeted pig fetal fibroblasts.**

A. Example of PCR results. Primers amplified a 1.5 kb product from the wild-type allele and 3.2 kb product from the *LDLR*-targeted allele. Lanes 1-5 are examples of PCR-positive cell clones. Lane 6 is a wild-type cell clone. B. Southern blot of whole genome amplified DNA. (Left) *XmnI* digested genomic DNA was hybridized with a probe that detects porcine *LDLR* downstream of the targeting vector boundary. The *LDLR*-targeted allele produced an approximately 7.8 kb band, and the wild-type band is approximately 6.0 kb. (Right) The same DNA was hybridized with a probe that detects the *Neo<sup>R</sup>* cassette, yielding only the targeted 7.8 kb band. Lane 3 is an example of a properly targeted cell line. Lane 5 is a wild-type control.
